# Supplementary material
Source: publisher site journal article supplement (https://www.spandidos-publications.com/6424/downloadSupplementary)
Supplement: Supplementary file 1 [file downloadSupplementary]

## Sheet: log2FC, p-value
Table SIIA. The most significantly up- or downregulated genes (adjusted p-value<1.3 and |log2FC>2|).
S.No.	Genes	log2FoldChange	X.logPvalue
1	HSPA6	10.5631	12.1415
2	TINCR	7.62213	5.47777
3	RASD1	7.40902	6.6439
4	FRG2B	7.40388	5.03755
5	RIMBP3C	6.66047	3.55968
6	AFF2	6.63366	3.52787
7	ARC	6.54623	4.82996
8	ASXL3	6.38699	3.06418
9	FCRL3	6.07091	2.67808
10	CCDC73	6.0573	2.67062
11	POU6F2	5.98614	2.54535
12	AKR1C1	5.95647	6.50292
13	CCDC170	5.88617	2.42618
14	NKAIN3	5.87582	2.41269
15	IL1RL1	5.79477	2.27869
16	LRRC15	5.77303	2.26872
17	RPH3A	5.69606	2.10121
18	TSHZ2	5.68011	2.15244
19	ALDH1A2	5.67415	2.14992
20	ANKRD34C	5.66819	2.13829
21	CCDC141	5.66819	2.13829
22	PNLDC1	5.66246	2.11669
23	PRKCB	5.66246	2.11669
24	H1-1	5.57952	1.97118
25	P2RY6	5.57406	1.99479
26	ATP6V0D2	5.56803	2.00683
27	LTA	5.56166	2.00903
28	NPIPB8	5.56166	2.00903
29	SNAP91	5.55518	2.00177
30	KRTAP3-2	5.4526	1.83453
31	GCNT3	5.4464	1.85376
32	AMPH	5.43963	1.86123
33	CDH1	5.43963	1.86123
34	DCX	5.43963	1.86123
35	NOS1	5.43963	1.86123
36	STEAP4	5.43963	1.86123
37	NWD1	5.4326	1.85869
38	DCDC2C	5.42557	1.84615
39	GSDMC	5.42557	1.84615
40	HMCN2	5.42557	1.84615
41	MUC17	5.42557	1.84615
42	MYT1L	5.41889	1.82194
43	NEDD8-MDP1	5.41304	1.78234
44	PKHD1L1	5.41304	1.78234
45	TPTEP2-CSNK1E	5.41279	1.49584
46	CNGB1	5.32408	1.60764
47	KRTAP4-8	5.31955	1.66313
48	NIBAN3	5.31334	1.69185
49	WDR72	5.31334	1.69185
50	CEACAM6	5.30624	1.70598
51	MYBPC1	5.30624	1.70598
52	NPY1R	5.30624	1.70598
53	ITIH4	5.29863	1.70867
54	DLGAP1	5.29086	1.70089
55	TENM1	5.29086	1.70089
56	MUC16	5.2833	1.68174
57	PGF	5.27456	1.38257
58	PLGLB1	5.2714	1.58769
59	INA	5.17196	1.47171
60	DACH1	5.16637	1.51975
61	EFNA2	5.15907	1.5426
62	LRRD1	5.15907	1.5426
63	SLC4A10	5.15907	1.5426
64	SLC12A1	5.15089	1.55128
65	ERBB4	5.14231	1.54872
66	KLHL6	5.14231	1.54872
67	PAK5	5.14231	1.54872
68	PRLR	5.14191	2.58258
69	APOE	5.13374	1.53498
70	ARHGAP25	5.13374	1.53498
71	CALHM1	5.13374	1.53498
72	MUC3A	5.13374	1.53498
73	NTRK3	5.13374	1.53498
74	FIBIN	5.11946	1.45465
75	SPINK1	5.08617	2.50837
76	CCDC152	5.08314	1.44513
77	FRG2	5.07868	2.49464
78	FAM209A	5.04833	1.44828
79	GLRA2	5.00172	1.3294
80	PALM	5.00172	1.3294
81	DYDC2	4.99479	1.36904
82	HOXD1	4.99479	1.36904
83	NRXN1	4.99479	1.36904
84	VTCN1	4.99479	1.36904
85	C8orf34	4.98615	1.38607
86	KIF1A	4.98615	1.38607
87	MUC22	4.98615	1.38607
88	SLC24A2	4.98615	1.38607
89	ADAMTS18	4.9767	1.38932
90	ERG	4.9767	1.38932
91	GIMD1	4.9767	1.38932
92	GPR158	4.9767	1.38932
93	HPSE2	4.9767	1.38932
94	SLC22A2	4.9767	1.38932
95	DSG1	4.96698	1.38093
96	KDR	4.96698	1.38093
97	MYO1H	4.96698	1.38093
98	SLC8A2	4.96698	1.38093
99	CLSTN2	4.95764	1.35901
100	FNDC7	4.95764	1.35901
101	MCIDAS	4.95764	1.35901
102	RAET1L	4.95764	1.35901
103	SLC17A8	4.95764	1.35901
104	RSPO4	4.94983	1.31506
105	HCAR2	4.86049	2.18639
106	SPP1	4.82305	2.1441
107	ELOVL3	4.738	2.06796
108	CSTA	4.63228	1.91682
109	PAQR9	4.57509	1.87439
110	FAM83E	4.56581	1.87459
111	SCN11A	4.56581	1.87459
112	FYB1	4.51196	2.64315
113	DCLK1	4.48906	1.75887
114	ADAM28	4.48186	1.77791
115	CSMD3	4.47128	1.77234
116	PYGM	4.38696	1.67433
117	TNF	4.33986	2.40296
118	ANKRD22	4.2885	1.5524
119	SLC1A3	4.20959	2.50931
120	MORC1	4.16583	1.46886
121	PLPPR5	4.15126	3.18883
122	EBF1	4.11333	1.3175
123	CD200R1	4.02461	1.33997
124	CORO1A	4.02461	1.33997
125	ID2	3.9534	79.4928
126	NRK	3.73445	1.5548
127	GRK7	3.66432	1.42868
128	MAFB	3.65788	4.19697
129	SAA2	3.64984	1.45324
130	SLC9A2	3.63179	1.44389
131	CSF2	3.61246	2.15205
132	LHFPL3	3.55247	1.35494
133	CXCL8	3.4917	91.6651
134	TMEM132B	3.45912	1.87026
135	ANGPTL4	3.43995	17.0455
136	FOS	3.41364	41.1647
137	SPANXN1	3.35673	1.34897
138	BIRC3	3.20907	156.308
139	ELAPOR2	3.2084	2.24197
140	DNAI3	3.17636	1.84944
141	GARIN1B	3.16489	1.63221
142	PKD1L1	3.08726	1.53607
143	CERKL	3.05838	1.37999
144	GOLGA7B	3.03254	1.9148
145	AKR7L	2.96105	2.31836
146	TREX2	2.95913	1.49326
147	BCL2A1	2.941	7.62425
148	TP63	2.93871	1.34214
149	SLC3A1	2.8381	1.64243
150	SCUBE2	2.83199	1.46705
151	NGF	2.73869	2.05305
152	CXCL1	2.71354	18.7831
153	AADAC	2.70661	4.42335
154	SIRPB1	2.69786	1.83416
155	STC1	2.68701	82.8894
156	GREB1	2.65629	2.02798
157	RGPD1	2.62808	1.55206
158	SH2D1B	2.61313	2.80829
159	CXCR4	2.60507	2.64425
160	LAMP3	2.59917	1.34231
161	TNFRSF9	2.5188	1.76739
162	P2RY1	2.51228	1.51406
163	RAET1E	2.50989	5.36212
164	CASS4	2.45743	1.5805
165	CCDC168	2.44588	2.37203
166	TFEC	2.43143	3.31834
167	GRM8	2.40787	1.33181
168	C2orf50	2.38746	1.77922
169	RAB39A	2.36947	3.77085
170	LCP1	2.3433	6.39253
171	BTG2	2.34192	1.44025
172	IL6	2.28044	2.9651
173	GABRR2	2.27765	1.53512
174	STYK1	2.2654	3.19875
175	FOSB	2.2481	17.3788
176	ESM1	2.24412	53.2994
177	SERPIND1	2.21915	6.11505
178	TNFAIP3	2.19068	31.2788
179	STX16-NPEPL1	2.18348	2.11683
180	TFPI2	2.18166	89.1792
181	IL13RA2	2.1755	11.347
182	BACH2	2.16092	1.55718
183	AOC3	2.13889	2.80893
184	MMP1	2.13205	132.637
185	GRM1	2.12935	1.42238
186	PANX2	2.12178	1.72315
187	TMEM156	2.08187	16.6427
188	VNN1	2.06076	9.9841
189	CXCL5	2.05243	1.96277
190	TNFSF8	2.02462	1.56287
191	MFSD2A	2.01645	6.68709
192	ZNF723	2.00648	3.10879
193	COL1A2	-2.01841	98.8602
194	VSIR	-2.02145	3.22931
195	ERBB3	-2.02229	3.86405
196	INSIG1	-2.04358	83.5622
197	SEMA3B	-2.08472	6.32356
198	PSG3	-2.09151	1.81464
199	FAXDC2	-2.10593	4.18138
200	PIK3IP1	-2.1484	7.02968
201	ACTBL2	-2.15912	2.03284
202	SCN2B	-2.16077	1.57986
203	GLP2R	-2.1869	1.78011
204	C16orf86	-2.18986	1.84209
205	STON1	-2.25043	6.06014
206	RXFP2	-2.2591	26.4772
207	SAMD11	-2.2601	1.38654
208	CPA4	-2.28259	114.965
209	TENM2	-2.3369	7.83405
210	OLFML2A	-2.34995	6.2398
211	CLDN7	-2.35752	4.02548
212	ATP8A1	-2.3688	4.55761
213	KRT81	-2.41985	9.80509
214	FILIP1L	-2.42053	71.1462
215	LIPG	-2.43152	29.3035
216	GNAO1	-2.43925	1.40893
217	CRISPLD2	-2.44402	11.9418
218	NAALADL1	-2.46174	2.8699
219	PLA2G3	-2.46658	1.94517
220	TMEM119	-2.49904	1.52054
221	C22orf15	-2.52525	2.81292
222	SHOC1	-2.52814	7.11653
223	STRA6	-2.53933	1.40513
224	HOXC4	-2.58317	2.44989
225	GRIN2A	-2.58381	31.7748
226	COL3A1	-2.6275	6.1326
227	IGFBP5	-2.63011	19.9883
228	L1CAM	-2.63194	14.1072
229	SREBF1	-2.69438	53.0328
230	SLC2A12	-2.76726	27.5637
231	KRT86	-2.77527	5.5176
232	ROS1	-2.83736	5.09935
233	SCD	-2.85756	234.145
234	GDF5	-2.85914	44.1836
235	TNFRSF6B	-2.86731	6.5031
236	ADCYAP1	-3.0331	16.1071
237	PADI3	-3.09648	1.50241
238	CFI	-3.15097	2.28231
239	FGL2	-3.16756	1.52199
240	PLAC8	-3.22007	3.59026
241	FABP3	-3.22853	15.1625
242	ISLR	-3.25716	1.64811
243	ATP2C2	-3.51711	2.62758
244	RNF208	-3.52998	1.99265
245	CSDC2	-3.80722	5.23759
246	PIP5KL1	-3.88682	2.07441
247	MSTN	-3.9429	7.78167
248	GALNT15	-4.54407	8.37963
249	GPT	-4.93939	1.35923
250	LCN12	-4.93939	1.35923
251	CCN5	-5.14987	3.97654
252	TNFSF12-TNFSF13	-5.17794	1.33674
253	ABCG1	-5.2023	4.05126
254	MUSTN1	-5.27706	1.66972
255	TSPAN32	-5.42012	1.81426
256	CPAMD8	-5.68396	2.05045
257	TBC1D3C	-5.80464	2.10094
258	URGCP-MRPS24	-6.10041	2.76289
259	ATF7-NPFF	-6.54694	3.44744

## Sheet: Heatmap_rawmatrix_2-D08
Table SIIB. Heatmap input.
	LMS_1	LMS_2	LMS_2_D08_1	LMS_2_D08_2
HSPA6	-0.865287	-0.865287	0.915854	0.81472
TINCR	-0.865791	-0.865791	0.837325	0.894258
RASD1	-0.982566	-0.740086	0.822138	0.900514
FRG2B	-0.865965	-0.865965	0.85145	0.880479
RIMBP3C	-0.818871	-0.818871	1.2175	0.420246
AFF2	-0.839159	-0.839159	0.536464	1.14185
ARC	-0.992689	-0.672798	1.12854	0.53695
ASXL3	-0.806528	-0.806528	0.360405	1.25265
FCRL3	-0.859844	-0.859844	0.713772	1.00592
CCDC73	-0.85897	-0.85897	1.01499	0.702953
POU6F2	-0.853274	-0.853274	0.643873	1.06267
AKR1C1	-1.05648	-0.649169	0.790352	0.915299
CCDC170	-0.865244	-0.865244	0.813236	0.917253
NKAIN3	-0.856999	-0.856999	1.03337	0.680629
IL1RL1	-0.849167	-0.849167	0.608684	1.08965
LRRC15	-0.847799	-0.847799	1.09775	0.597853
RPH3A	-0.802361	-0.802361	0.341458	1.26327
TSHZ2	-0.864954	-0.864954	0.804065	0.925844
ALDH1A2	-0.864564	-0.864564	0.935678	0.793451
ANKRD34C	-0.854048	-0.854048	1.05703	0.651064
CCDC141	-0.854048	-0.854048	1.05703	0.651064
PNLDC1	-0.832981	-0.832981	1.16807	0.49789
PRKCB	-0.832981	-0.832981	1.16807	0.49789
H1-1	-0.811625	-0.811625	0.384389	1.23886
P2RY6	-0.842758	-0.842758	0.560769	1.12475
ATP6V0D2	-0.8605	-0.8605	0.722371	0.998629
LTA	-0.866018	-0.866018	0.871163	0.860872
NPIPB8	-0.866018	-0.866018	0.871163	0.860872
SNAP91	-0.859667	-0.859667	1.00781	0.711527
KRTAP3-2	-0.821508	-0.821508	0.433891	1.20913
GCNT3	-0.850654	-0.850654	0.620928	1.08038
AMPH	-0.864485	-0.864485	0.79148	0.937491
CDH1	-0.864485	-0.864485	0.79148	0.937491
DCX	-0.864485	-0.864485	0.79148	0.937491
NOS1	-0.864485	-0.864485	0.79148	0.937491
STEAP4	-0.864485	-0.864485	0.79148	0.937491
NWD1	-0.864024	-0.864024	0.947244	0.780803
DCDC2C	-0.849337	-0.849337	1.08862	0.610058
GSDMC	-0.849337	-0.849337	1.08862	0.610058
HMCN2	-0.849337	-0.849337	1.08862	0.610058
MUC17	-0.849337	-0.849337	1.08862	0.610058
MYT1L	-0.819537	-0.819537	1.21541	0.423659
NEDD8-MDP1	-0.771914	-0.771914	1.32716	0.216667
PKHD1L1	-0.771914	-0.771914	1.32716	0.216667
TPTEP2-CSNK1E	-0.5	-0.5	1.5	-0.5
CNGB1	-0.709177	-0.709177	0.00622915	1.41212
KRTAP4-8	-0.785292	-0.785292	0.268928	1.30166
NIBAN3	-0.831934	-0.831934	0.491684	1.17218
WDR72	-0.831934	-0.831934	0.491684	1.17218
CEACAM6	-0.85793	-0.85793	0.690864	1.025
MYBPC1	-0.85793	-0.85793	0.690864	1.025
NPY1R	-0.85793	-0.85793	0.690864	1.025
ITIH4	-0.866018	-0.866018	0.87117	0.860865
DLGAP1	-0.856937	-0.856937	1.03391	0.679969
TENM1	-0.856937	-0.856937	1.03391	0.679969
MUC16	-0.830127	-0.830127	1.17909	0.481162
PGF	-0.5	-0.5	1.5	-0.5
PLGLB1	-0.707067	-0.707067	1.41425	-0.000118414
INA	-0.719663	-0.719663	0.038364	1.40096
DACH1	-0.797646	-0.797646	0.320654	1.27464
EFNA2	-0.842668	-0.842668	0.560144	1.12519
LRRD1	-0.842668	-0.842668	0.560144	1.12519
SLC4A10	-0.842668	-0.842668	0.560144	1.12519
SLC12A1	-0.863657	-0.863657	0.773142	0.954172
ERBB4	-0.863093	-0.863093	0.963796	0.76239
KLHL6	-0.863093	-0.863093	0.963796	0.76239
PAK5	-0.863093	-0.863093	0.963796	0.76239
PRLR	-1.10899	-0.57227	0.961713	0.719549
APOE	-0.8411	-0.8411	1.13282	0.549376
ARHGAP25	-0.8411	-0.8411	1.13282	0.549376
CALHM1	-0.8411	-0.8411	1.13282	0.549376
MUC3A	-0.8411	-0.8411	1.13282	0.549376
NTRK3	-0.8411	-0.8411	1.13282	0.549376
FIBIN	-0.717495	-0.717495	1.40335	0.0316369
SPINK1	-1.11907	-0.568669	0.849652	0.838087
CCDC152	-0.804336	-0.804336	0.350369	1.2583
FRG2	-1.10958	-0.562223	1.00215	0.669652
FAM209A	-0.82789	-0.82789	1.18733	0.468453
GLRA2	-0.731876	-0.731876	0.0771116	1.38664
PALM	-0.731876	-0.731876	0.0771116	1.38664
DYDC2	-0.811381	-0.811381	0.383222	1.23954
HOXD1	-0.811381	-0.811381	0.383222	1.23954
NRXN1	-0.811381	-0.811381	0.383222	1.23954
VTCN1	-0.811381	-0.811381	0.383222	1.23954
C8orf34	-0.853136	-0.853136	0.642621	1.06365
KIF1A	-0.853136	-0.853136	0.642621	1.06365
MUC22	-0.853136	-0.853136	0.642621	1.06365
SLC24A2	-0.853136	-0.853136	0.642621	1.06365
ADAMTS18	-0.866018	-0.866018	0.871178	0.860858
ERG	-0.866018	-0.866018	0.871178	0.860858
GIMD1	-0.866018	-0.866018	0.871178	0.860858
GPR158	-0.866018	-0.866018	0.871178	0.860858
HPSE2	-0.866018	-0.866018	0.871178	0.860858
SLC22A2	-0.866018	-0.866018	0.871178	0.860858
DSG1	-0.851913	-0.851913	1.07212	0.631709
KDR	-0.851913	-0.851913	1.07212	0.631709
MYO1H	-0.851913	-0.851913	1.07212	0.631709
SLC8A2	-0.851913	-0.851913	1.07212	0.631709
CLSTN2	-0.809288	-0.809288	1.2453	0.373274
FNDC7	-0.809288	-0.809288	1.2453	0.373274
MCIDAS	-0.809288	-0.809288	1.2453	0.373274
RAET1L	-0.809288	-0.809288	1.2453	0.373274
SLC17A8	-0.809288	-0.809288	1.2453	0.373274
RSPO4	-0.729651	-0.729651	1.38936	0.0699402
HCAR2	-1.10786	-0.517731	0.510049	1.11555
SPP1	-1.11447	-0.5153	0.528215	1.10155
ELOVL3	-1.14925	-0.524219	0.791002	0.882464
CSTA	-1.08831	-0.468806	1.21645	0.340668
PAQR9	-1.15598	-0.494684	0.657038	0.993628
FAM83E	-1.1643	-0.50048	0.896365	0.768413
SCN11A	-1.1643	-0.50048	0.896365	0.768413
FYB1	-0.559726	-1.08839	0.555757	1.09236
DCLK1	-1.12733	-0.457025	0.428049	1.1563
ADAM28	-1.16994	-0.484519	0.709222	0.94524
CSMD3	-1.1687	-0.484213	0.956121	0.69679
PYGM	-1.17142	-0.464256	0.624821	1.01086
TNF	-0.557413	-1.12613	0.886249	0.797296
ANKRD22	-1.13082	-0.415962	0.353893	1.19289
SLC1A3	-1.17945	-0.443737	1.0291	0.594091
MORC1	-1.20541	-0.435848	0.749315	0.89194
PLPPR5	-0.850089	-0.877324	0.775175	0.952238
EBF1	-0.918883	-0.263872	1.42402	-0.24126
CD200R1	-1.17719	-0.391532	1.12384	0.444873
CORO1A	-1.17719	-0.391532	1.12384	0.444873
ID2	-0.920451	-0.809734	0.87791	0.852275
NRK	-0.460653	-1.18533	0.704323	0.941659
GRK7	-0.400353	-1.1231	0.304619	1.21884
MAFB	-0.673707	-1.0292	0.715589	0.987319
SAA2	-0.439401	-1.18701	0.619124	1.00729
SLC9A2	-0.439011	-1.18497	1.01748	0.606504
CSF2	-0.837895	-0.872689	0.663856	1.04673
LHFPL3	-0.42565	-1.20485	0.677607	0.952893
CXCL8	-0.905964	-0.825077	0.854893	0.876148
TMEM132B	-0.759964	-0.794766	1.31691	0.237824
ANGPTL4	-0.801489	-0.899998	1.07445	0.627035
FOS	-0.815895	-0.912428	0.928347	0.799977
SPANXN1	-1.19274	-0.235806	0.213572	1.21497
BIRC3	-0.899618	-0.82988	0.808156	0.921342
ELAPOR2	-0.691833	-1.00179	0.642369	1.05126
DNAI3	-1.20451	-0.194281	0.183104	1.21568
GARIN1B	-0.339369	-1.25502	0.658035	0.93635
PKD1L1	-0.325448	-1.2664	0.903925	0.687921
CERKL	-1.17601	-0.146214	0.0604976	1.26173
GOLGA7B	-0.650027	-0.976329	1.20159	0.424764
AKR7L	-1.13423	-0.547337	0.848473	0.833092
TREX2	-1.12247	-0.112155	1.31205	-0.0774228
BCL2A1	-0.83141	-0.882487	0.681944	1.03195
TP63	-0.281582	-1.26888	1.00835	0.542116
SLC3A1	-0.665648	-1.04066	0.94856	0.757745
SCUBE2	-0.918204	-0.6319	1.3024	0.247704
NGF	-0.889974	-0.728613	1.23776	0.380831
CXCL1	-0.852478	-0.87606	0.787208	0.941331
AADAC	-0.851677	-0.821618	1.15258	0.52071
SIRPB1	-1.16711	-0.499155	0.817597	0.848667
STC1	-0.932147	-0.797172	0.87784	0.851478
GREB1	-0.713351	-0.991677	0.687975	1.01705
RGPD1	-0.169322	-1.26432	1.13226	0.301384
SH2D1B	-0.674203	-1.0148	0.633239	1.05576
CXCR4	-1.14204	-0.506131	1.02575	0.62242
LAMP3	-1.3271	-0.0645785	0.33099	1.06069
TNFRSF9	-0.693365	-0.992762	0.606256	1.07987
P2RY1	-1.14209	-0.427734	0.410425	1.1594
RAET1E	-0.781508	-0.943549	0.788197	0.93686
CASS4	-0.377526	-1.06086	1.30977	0.128617
CCDC168	-0.829402	-0.894808	0.973825	0.750385
TFEC	-1.11049	-0.580432	0.833206	0.857716
GRM8	-0.818536	-0.884165	1.07345	0.629253
C2orf50	-0.825179	-0.892406	1.01313	0.704456
RAB39A	-1.02342	-0.620169	0.492165	1.15142
LCP1	-0.702592	-0.999357	0.678732	1.02322
BTG2	-0.377061	-1.14852	0.329764	1.19582
IL6	-1.02713	-0.67323	1.00208	0.698283
GABRR2	-0.736376	-0.802438	1.3306	0.208216
STYK1	-1.22305	-0.410506	0.790458	0.843097
FOSB	-0.929345	-0.799526	0.900362	0.828508
ESM1	-0.878058	-0.850054	0.782712	0.945401
SERPIND1	-0.981753	-0.740986	0.821454	0.901284
TNFAIP3	-0.913403	-0.816531	0.82867	0.901264
STX16-NPEPL1	-0.797888	-0.87296	1.15593	0.514915
TFPI2	-0.949996	-0.777576	0.846001	0.88157
IL13RA2	-0.772558	-0.943621	0.716493	0.999686
BACH2	-0.935592	-0.787676	0.763127	0.960142
AOC3	-0.755139	-0.936465	1.09282	0.598781
MMP1	-0.856702	-0.87528	0.871749	0.860233
GRM1	-1.14674	-0.521498	0.730371	0.937865
PANX2	-1.25029	-0.351452	0.924333	0.677404
TMEM156	-0.804531	-0.925403	0.868321	0.861613
VNN1	-0.937697	-0.788569	0.796483	0.929783
CXCL5	-0.886667	-0.817332	0.635222	1.06878
TNFSF8	-1.08717	-0.588253	0.652635	1.02279
MFSD2A	-0.828019	-0.88277	1.04474	0.666048
ZNF723	-1.04708	-0.644576	0.67657	1.01509
COL1A2	0.908645	0.821266	-0.822593	-0.907319
VSIR	0.827941	0.89339	-0.728613	-0.992719
ERBB3	1.07123	0.632843	-0.846777	-0.857293
INSIG1	0.890547	0.838229	-0.934982	-0.793793
SEMA3B	0.964315	0.741626	-0.672733	-1.03321
PSG3	0.704093	0.916296	-1.22961	-0.390775
FAXDC2	0.985436	0.736806	-0.822574	-0.899669
PIK3IP1	1.11186	0.578642	-0.840303	-0.850197
ACTBL2	1.15759	0.451503	-1.08874	-0.520357
SCN2B	1.19062	0.455095	-0.925658	-0.720054
GLP2R	1.06611	0.555717	-1.15691	-0.46491
C16orf86	1.1738	0.38315	-0.415596	-1.14135
STON1	0.519701	1.14994	-0.917632	-0.752005
RXFP2	0.872026	0.85928	-0.900985	-0.830321
SAMD11	0.993381	0.716404	-0.993234	-0.716551
CPA4	0.879466	0.852475	-0.863204	-0.868737
TENM2	1.04989	0.659725	-0.831462	-0.878156
OLFML2A	0.998425	0.704084	-0.680749	-1.02176
CLDN7	1.04519	0.665078	-0.892061	-0.818211
ATP8A1	0.807482	0.916513	-0.966632	-0.757363
KRT81	0.993597	0.716993	-0.721828	-0.988762
FILIP1L	0.810977	0.912014	-0.975949	-0.747042
LIPG	0.954894	0.772106	-0.843941	-0.883059
GNAO1	0.670346	0.994035	-1.13006	-0.534323
CRISPLD2	1.0124	0.700567	-0.764002	-0.94897
NAALADL1	1.13047	0.541924	-0.958468	-0.713927
PLA2G3	0.85307	0.878876	-0.862082	-0.869864
TMEM119	1.15432	0.400301	-0.390723	-1.16389
C22orf15	0.935781	0.789954	-0.788016	-0.937719
SHOC1	0.826759	0.904412	-0.861692	-0.869479
STRA6	0.904366	0.762444	-0.508079	-1.15873
HOXC4	0.968724	0.728548	-0.636001	-1.06127
GRIN2A	0.782893	0.945325	-0.870054	-0.858164
COL3A1	0.970192	0.736688	-1.02563	-0.681253
IGFBP5	0.872659	0.852848	-0.968652	-0.756855
L1CAM	0.832098	0.896746	-0.797301	-0.931543
SREBF1	0.926185	0.803461	-0.844886	-0.88476
SLC2A12	1.02203	0.694357	-0.845188	-0.871197
KRT86	0.92204	0.792193	-1.01987	-0.694363
ROS1	0.81138	0.909503	-0.730542	-0.990341
SCD	0.87313	0.858763	-0.880828	-0.851065
GDF5	0.963464	0.757614	-0.951925	-0.769154
TNFRSF6B	1.04273	0.579361	-1.17261	-0.449489
ADCYAP1	0.884602	0.833147	-0.703928	-1.01382
PADI3	0.367606	1.14714	-1.20554	-0.309204
CFI	0.693428	0.853754	-0.228901	-1.31828
FGL2	1.17342	0.489803	-0.829045	-0.834181
PLAC8	1.10902	0.566423	-0.686608	-0.988839
FABP3	0.822709	0.907017	-0.912261	-0.817466
ISLR	0.520267	1.153	-0.8342	-0.839065
ATP2C2	0.907528	0.675856	-0.308962	-1.27442
RNF208	1.22992	0.399582	-0.812628	-0.81687
CSDC2	0.98761	0.696791	-0.596739	-1.08766
PIP5KL1	0.861378	0.760246	-0.383483	-1.23814
MSTN	0.620446	1.06604	-0.675171	-1.01131
GALNT15	0.865908	0.859035	-0.97326	-0.751683
GPT	1.10243	0.591528	-0.846979	-0.846979
LCN12	1.10243	0.591528	-0.846979	-0.846979
CCN5	0.860082	0.847686	-1.05815	-0.649617
TNFSF12-TNFSF13	1.5	-0.5	-0.5	-0.5
ABCG1	1.0273	0.661891	-1.04443	-0.644766
MUSTN1	1.20364	0.442715	-0.823179	-0.823179
TSPAN32	1.23771	0.386364	-0.812036	-0.812036
CPAMD8	1.37016	0.118837	-0.744497	-0.744497
TBC1D3C	1.44619	-0.106677	-0.669757	-0.669757
URGCP-MRPS24	0.741799	0.98191	-0.861855	-0.861855
ATF7-NPFF	1.05215	0.657248	-0.854697	-0.854697
